# Supplementary material for: NMR-based metabolomics for simultaneously evaluating multiple determinants of primary beef quality in Japanese Black cattle
Source: PubMed Central journal article supplement (PMC5431055; doi:10.1038/s41598-017-01272-8), 2017-05-02
Supplement: 41598_2017_1272_MOESM1_ESM.pdf [file 41598_2017_1272_MOESM1_ESM.pdf]

## Supplementary Information

# NMR-based metabolomics for simultaneously evaluating multiple determinants of primary beef quality in Japanese Black cattle

Yoshinori Kodani, Takuya Miyakawa, Tomohiko Komatsu, Masaru Tanokura\*

\*Corresponding author. E-mail: amtanok@mail.ecc.u-tokyo.ac.jp

### Contents

**Supplementary Table 1:**  $^1\text{H}$  and  $^{13}\text{C}$  signal assignments of the compounds detected in  $\text{D}_2\text{O}$  extracts

**Supplementary Figure S1.** Loading plot for PC2 of the score plot that was generated using the  $^1\text{H}$  NMR spectra of the  $\text{D}_2\text{O}$  extracts of ribeye samples with different aging duration.

**Supplementary Figure S2:** PCA score plot of the  $\text{CDCl}_3$  extracts of ribulose samples with different aging duration (0, 2, 4, 6, 8 and 10 weeks)

**Supplementary Figure S3:**  $^1\text{H}$  NMR spectrum of an equimolar mixture of nucleotides (ATP, ADP, AMP and IMP) and HxR

**Supplementary Table S1. <sup>1</sup>H and <sup>13</sup>C signal assignments of the compounds detected in D<sub>2</sub>O extracts**

| Compound           | Abbreviation | Assignment                                | Chemical shift (ppm)          |                 |
|--------------------|--------------|-------------------------------------------|-------------------------------|-----------------|
|                    |              |                                           | <sup>1</sup> H (multiplicity) | <sup>13</sup> C |
| <i>Amino acids</i> |              |                                           |                               |                 |
| alanine            | Ala          | $\alpha$ -CH                              | 3.77                          | 53.30           |
|                    |              | $\beta$ -CH <sub>3</sub>                  | 1.48 (d) *                    | 18.89           |
|                    |              | COOH                                      |                               | 178.60          |
| anserine           | Ans          | CH-2, ring                                | 8.23                          | 139.13          |
|                    |              | C-4, ring                                 |                               | 133.13          |
|                    |              | CH-5, ring                                | 7.09 (s)                      | 123.27          |
|                    |              | N-CH <sub>3</sub>                         | 3.77 (s)                      | 35.93           |
| carnitine          |              | $\alpha$ -CH <sub>2</sub>                 | 2.42                          | 45.72           |
|                    |              | $\beta$ -CH                               | 4.57                          | 66.70           |
|                    |              | $\gamma$ -CH <sub>2</sub>                 | 3.42                          | 72.79           |
|                    |              | N(CH <sub>3</sub> ) <sub>3</sub>          | 3.21 (s) *                    | 56.77           |
|                    |              | COOH                                      |                               | 180.40          |
| carnosine          | Car          | $\beta$ -alanyl $\alpha$ -CH <sub>2</sub> | 2.67 (m) *                    |                 |
|                    |              | $\beta$ -alanyl $\beta$ -CH <sub>2</sub>  | 3.21                          |                 |
|                    |              | Histidyl $\alpha$ -CH                     | 4.47 (m)                      |                 |
|                    |              | Histidyl $\beta$ -CH <sub>2</sub>         | 3.09                          | 29.99           |
|                    |              | CH-2, ring                                | 8.18 (s)                      | 137.08          |
|                    |              | C-4, ring                                 |                               | 133.95          |
|                    |              | CH-5, ring                                | 7.11 (s)                      | 119.85          |
|                    |              | COOH                                      |                               | 179.35          |
|                    |              | CONH                                      |                               | 174.42          |
| creatine           | Cr           | $\alpha$ -CH <sub>2</sub>                 | 3.92 (s)                      | 56.57           |
|                    |              | N-CH <sub>3</sub>                         | 3.03 (s) *                    | 39.65           |
|                    |              | COOH                                      |                               | 177.43          |
|                    |              | NH=C(NH <sub>2</sub> )-N                  |                               | 159.89          |
| glutamic acid      | Glu          | $\beta$ -CH <sub>2</sub>                  | 2.05 (m)                      | 29.70           |
|                    |              | $\gamma$ -CH <sub>2</sub>                 | 2.35 (m) *                    | 36.07           |
|                    |              | $\alpha$ -CH <sub>2</sub> -COOH           |                               | 177.19          |
|                    |              | $\gamma$ -CH <sub>2</sub> -COOH           |                               | 183.81          |
| glutamine          | Gln          | $\beta$ -CH <sub>2</sub>                  | 2.13 (m)                      |                 |
|                    |              | $\gamma$ -CH <sub>2</sub>                 | 2.45 (m) *                    |                 |
|                    |              | COOH                                      |                               | 176.74          |
|                    |              | CONH <sub>2</sub>                         |                               | 180.40          |

(to be continued)

Supplementary Table S1 (continued)

| Compound          | Abbreviation  | Assignment                 | Chemical shift (ppm)          |                 |
|-------------------|---------------|----------------------------|-------------------------------|-----------------|
|                   |               |                            | <sup>1</sup> H (multiplicity) | <sup>13</sup> C |
| glycine           | Gly           | $\alpha$ -CH <sub>2</sub>  | 3.55                          | 44.09           |
|                   |               | COOH                       |                               | 175.17          |
| isoleucine        | Ile           | $\alpha$ -CH               | 3.66                          | 62.42           |
|                   |               | $\beta$ -CH                | 1.97                          | 38.69           |
|                   |               | $\gamma$ -CH <sub>2</sub>  |                               | 27.22           |
|                   |               | $\gamma'$ -CH <sub>3</sub> | 1.00 (d) *                    |                 |
|                   |               | $\delta$ -CH <sub>3</sub>  | 0.93                          | 13.59           |
|                   |               | COOH                       |                               | 177.43          |
| leucine           | Leu           | $\alpha$ -CH               | 3.73                          | 56.17           |
|                   |               | $\beta$ -CH <sub>2</sub>   | 1.70 (m) *                    | 42.59           |
|                   |               | $\gamma$ -CH               | 1.69 (m) *                    | 26.96           |
|                   |               | $\delta$ -CH <sub>3</sub>  | 0.94                          | 23.68           |
|                   |               | $\delta'$ -CH <sub>3</sub> | 0.96                          | 24.78           |
|                   |               | COOH                       |                               | 178.35          |
| phenylalanine     | Phe           | $\beta$ -CH <sub>2</sub>   | 3.12, 3.27                    |                 |
|                   |               | C-1, ring                  |                               | 137.90          |
|                   |               | CH-2,6, ring               | 7.32 (d) *                    | 131.78          |
|                   |               | CH-3,5, ring               | 7.42 (dd)                     | 131.65          |
|                   |               | CH-4, ring                 | 7.38 (t)                      | 130.28          |
| tyrosine          | Tyr           | C-1                        |                               | 129.61          |
|                   |               | CH-2,6, ring               | 7.18 (d)                      | 133.50          |
|                   |               | CH-3,5, ring               | 6.88 (d) *                    | 118.55          |
|                   |               | CH-4                       |                               | 157.91          |
| valine            | Val           | $\alpha$ -CH               | 3.60 (d) *                    | 63.04           |
|                   |               | $\beta$ -CH                | 2.27                          | 31.98           |
|                   |               | $\gamma$ -CH <sub>3</sub>  | 0.97 (d)                      | 19.42           |
|                   |               | $\gamma'$ -CH <sub>3</sub> | 1.03 (d)                      | 20.50           |
| <b>Sugars</b>     |               |                            |                               |                 |
| $\alpha$ -glucose | $\alpha$ -Glc | CH-1                       | 5.23 (d) *                    | 94.67           |
|                   |               | CH-2                       | 3.53                          | 74.04           |
|                   |               | CH-3                       | 3.71                          | 75.30           |
|                   |               | CH-4                       | 3.40                          | 72.29           |
|                   |               | CH-5                       | 3.83                          | 74.06           |
|                   |               | CH <sub>2</sub> -6         | 3.77, 3.84                    | 63.24           |

(to be continued)

Supplementary Table S1 (continued)

| Compound                  | Abbreviation | Assignment                       | Chemical shift (ppm)          |                 |
|---------------------------|--------------|----------------------------------|-------------------------------|-----------------|
|                           |              |                                  | <sup>1</sup> H (multiplicity) | <sup>13</sup> C |
| β-glucose                 | β-Glc        | CH-1                             | 4.64 (d) *                    | 98.57           |
|                           |              | CH-2                             | 3.24                          | 76.84           |
|                           |              | CH-3                             | 3.47                          | 72.29           |
|                           |              | CH-4                             | 3.40                          | 72.29           |
|                           |              | CH-5                             | 3.47                          | 78.55           |
|                           |              | CH <sub>2</sub> -6               | 3.72, 3.90                    | 63.42           |
| <i>Purine derivatives</i> |              |                                  |                               |                 |
| inosine                   | HxR          | CH-1'                            | 6.09 (d) *                    | 91.12           |
|                           |              | CH-2                             | 8.23                          |                 |
|                           |              | CH-8                             | 8.34 (s)                      | 142.88          |
| inosine<br>monophosphate  | IMP          | CH-1'                            | 6.14 (d) *                    |                 |
|                           |              | CH-2                             | 8.22                          |                 |
|                           |              | CH-8                             | 8.58 (s)                      |                 |
| hypoxanthine              | Hx           | CH-2                             | 8.2 (s)                       |                 |
|                           |              | CH-8                             | 8.19                          |                 |
| <i>Organic acids</i>      |              |                                  |                               |                 |
| acetic acid               | AcOH         | CH <sub>3</sub>                  | 1.93 (s) *                    | 25.53           |
|                           |              | COOH                             |                               | 183.81          |
| fumaric acid              |              | CH=CH                            | 6.51 (s) *                    |                 |
|                           |              | COOH                             |                               | 177.38          |
| lactic acid               |              | α-CH                             | 4.11 (q)                      | 71.23           |
|                           |              | β-CH <sub>3</sub>                | 1.32 (d) *                    | 22.90           |
|                           |              | COOH                             |                               | 185.28          |
| <i>Alcohol</i>            |              |                                  |                               |                 |
| ethanol                   | EtOH         | CH <sub>3</sub>                  | 1.17 (t) *                    | 19.45           |
|                           |              | CH <sub>2</sub>                  | 3.65                          | 60.13           |
| glycerol                  |              | CH <sub>2</sub> -1               | 3.55 (m)                      | 65.16           |
|                           |              | CH-2                             | 3.78 (m)                      | 74.74           |
|                           |              | CH <sub>2</sub> -3               | 3.66 (m) *                    | 65.16           |
| <i>Other compounds</i>    |              |                                  |                               |                 |
| betaine                   |              | N(CH <sub>3</sub> ) <sub>3</sub> | 3.25 (s) *                    | 56.17           |
|                           |              | CH <sub>2</sub>                  | 3.90 (s)                      | 68.93           |
|                           |              | COOH                             |                               | 172.02          |
| choline                   |              | N(CH <sub>3</sub> ) <sub>3</sub> | 3.19 (s)                      | 56.45           |

\*Proton signals were chosen for the quantitative analysis.

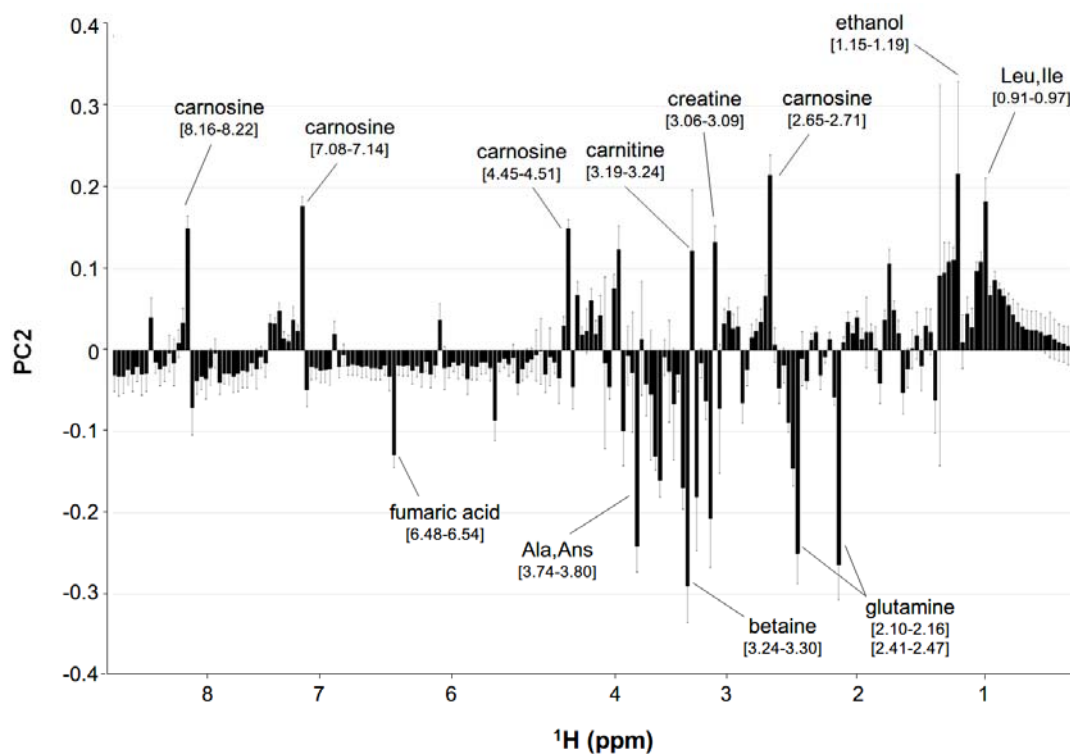

**Supplementary Figure S1. Loading plot for PC2 of the score plot that was generated using the  $^1\text{H}$  NMR spectra of the  $\text{D}_2\text{O}$  extracts of ribeye samples with different aging duration.** The PCA score plot is shown in Fig. 4A. Buckets with high loading values are labeled by the assigned compound names. The square brackets represent the chemical shift range of each spectral bucket.

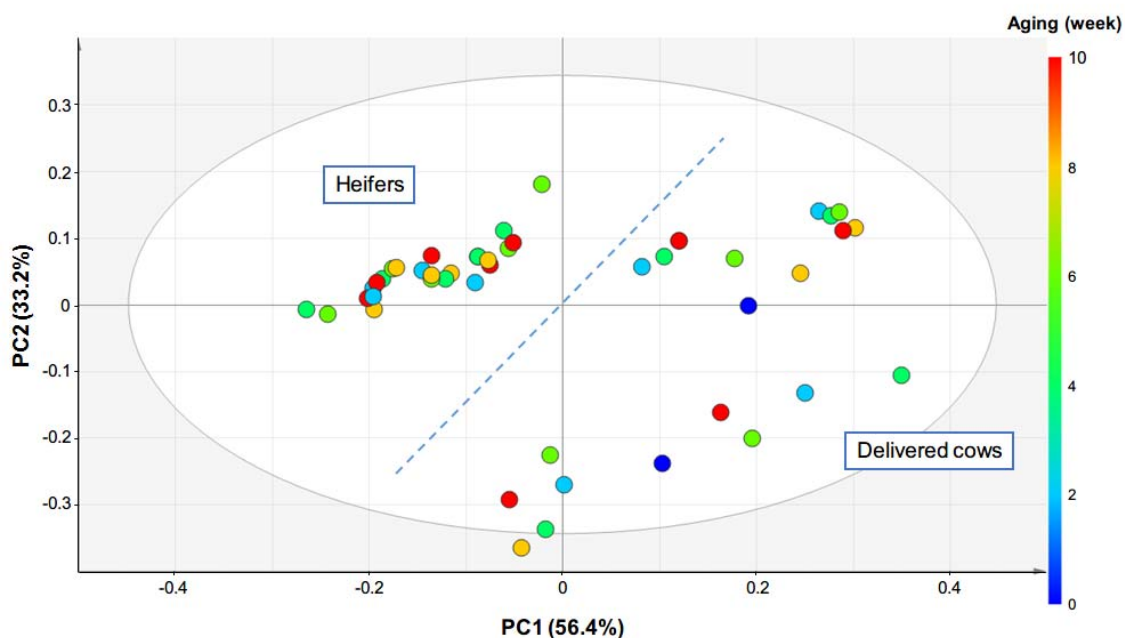

**Supplementary Figure S2. PCA score plot of the  $\text{CDCl}_3$  extracts of ribulose samples with different aging duration (0, 2, 4, 6, 8 and 10 weeks).** Ribulose samples are derived from heifers and delivered cows. The heifer samples are separated from the delivered cow in the score plot, and the individual regions are divided by a dashed line.

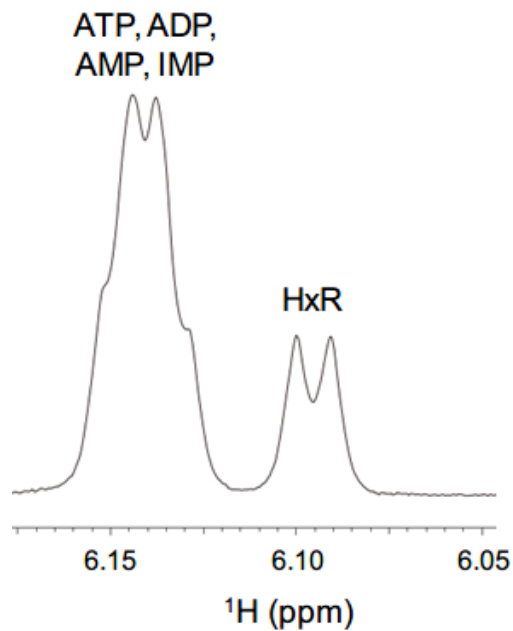

**Supplementary Figure S3.  $^1\text{H}$  NMR spectrum of an equimolar mixture of nucleotides (ATP, ADP, AMP and IMP) and HxR.** The signals observed near 6.10 and 6.15 ppm were derived from the  $^1\text{H}$  attached to the 1' position of the ribose ring. The nucleotides signals overlapped.
